# Supplementary material for: Optimization of anther culture of awnless triticale
Source: PeerJ. 2025 Sep 30;13:e19951. doi: 10.7717/peerj.19951 (PMC12493755; doi:10.7717/peerj.19951)
Supplement: Supplemental Information 1 [file peerj-13-19951-s001.xlsx]

## Sheet: Callus induction rate
	Callus induction rate		A1 (5 days)					A2 (10 days)						A3 (15 days)						A4 (20 days)							A5 (25 days)
			number of anther	number of callus	Callus induction rate				number of anther	number of callus	Callus induction rate				number of anther	number of callus	Callus induction rate				number of anther	number of callus	Callus induction rate					number of anther	number of callus	Callus induction rate
		B1	30	3	10			B1	40	7	17.5			B1	30	6	20			B1	30	2	6.66667				B1	40	3	7.5
		B1	30	4	13.3333			B1	40	4	10			B1	30	6	20			B1	30	3	10				B1	40	3	7.5
		B1	30	4	13.3333			B1	40	5	12.5			B1	30	5	16.6667			B1	30	3	10				B1	40	4	10
		B2	30	3	10			B2	40	4	10			B2	30	4	13.3333			B2	30	4	13.3333				B2	40	5	12.5
		B2	30	3	10			B2	40	4	10			B2	30	4	13.3333			B2	30	5	16.6667				B2	40	6	15
		B2	30	2	6.66667			B2	40	3	7.5			B2	30	5	16.6667			B2	30	5	16.6667				B2	40	4	10
		B3	30	3	10			B3	40	5	12.5			B3	30	7	23.3333			B3	30	4	13.3333				B3	40	4	10
		B3	30	2	6.66667			B3	40	6	15			B3	30	7	23.3333			B3	30	5	16.6667				B3	40	3	7.5
		B3	30	2	6.66667			B3	40	6	15			B3	30	6	20			B3	30	3	10				B3	40	3	7.5
		B4	30	2	6.66667			B4	40	5	12.5			B4	30	2	6.66667			B4	30	2	6.66667				B4	40	3	7.5
		B4	30	1	3.33333			B4	40	6	15			B4	30	2	6.66667			B4	30	3	10				B4	40	3	7.5
		B4	30	1	3.33333			B4	40	7	17.5			B4	30	3	10			B4	30	3	10				B4	40	3	7.5
		Repetition	Low-temperature pretreatment duration
	Hormone concentration		A1 (5 days)	A2 (10 days)	A3 (15 days)	A4 (20 days)	A5 (25 days)
	B1	1	10	17.5	20	6.66667	7.5
	B1	2	13.33	10	20	10	7.5
	B1	3	13.33	12.5	16.67	10	10
	B2	1	10	10	13.33	13.33	12.5
	B2	2	10	10	13.33	16.67	15
	B2	3	6.66	7.5	16.67	16.67	12.5
	B3	1	10	12.5	23.3333	13.33	10
	B3	2	6.66667	15	23.3333	16.67	7.5
	B3	3	6.66667	15	20	10	7.5
	B4	1	6.66667	12.5	6.66667	10	7.5
	B4	2	3.33333	15	6.66667	10	7.5
	B4	3	3.33333	17.5	10	6.66	7.5

## Sheet: Plantlet differentiation 
		Pretreatment days	Hormone concentrations	Number of callus	Number of green plantlets	Number of albino plantlets	Green plantlet differentiation frequency %	Albino plantlet differentiation frequency %
		A1	B1	11	1	1	9.09091	9.09091
		A1	B1	11	1	1	9.09091	9.09091
		A1	B1	12	1	1	8.33333	8.33333
		A1	B1	12	1	0	8.33333	0
		A1	B2	7	2	1	28.5714	14.2857
		A1	B2	8	2	1	25	12.5
		A1	B2	6	2	0	33.3333	0
		A1	B2	8	2	1	25	12.5
		A1	B3	7	0	1	0	14.2857
		A1	B3	6	0	1	0	16.6667
		A1	B3	7	0	1	0	14.2857
		A1	B3	8	0	1	0	12.5
		A1	B4	8	1	0	12.5	0
		A1	B4	9	1	0	11.1111	0
		A1	B4	8	1	0	12.5	0
		A1	B4	9	1	0	11.1111	0
		A2	B1	5	1	0	20	0
		A2	B1	4	1	1	25	25
		A2	B1	4	1	0	25	0
		A2	B1	4	1	0	25	0
		A2	B2	9	1	1	11.1111	11.1111
		A2	B2	9	1	1	11.1111	11.1111
		A2	B2	12	1	1	8.33333	8.33333
		A2	B2	12	1	1	8.33333	8.33333
		A2	B3	12	1	0	8.33333	0
		A2	B3	14	1	0	7.14286	0
		A2	B3	14	0	0	0	0
		A2	B3	12	0	0	0	0
		A2	B4	15	1	1	6.66667	6.66667
		A2	B4	15	1	1	6.66667	6.66667
		A2	B4	15	1	1	6.66667	6.66667
		A2	B4	15	0	0	0	0
		A3	B1	6	1	0	16.6667	0
		A3	B1	6	1	0	16.6667	0
		A3	B1	7	1	0	14.2857	0
		A3	B1	7	1	0	14.2857	0
		A3	B2	10	1	1	10	10
		A3	B2	10	0	0	0	0
		A3	B2	10	1	1	10	10
		A3	B2	16	0	1	0	6.25
		A3	B3	11	1	1	9.09091	9.09091
		A3	B3	12	1	1	8.33333	8.33333
		A3	B3	10	1	0	10	0
		A3	B3	11	1	0	9.09091	0
		A3	B4	10	2	1	20	10
		A3	B4	6	1	1	16.6667	16.6667
		A3	B4	10	2	1	20	10
		A3	B4	10	2	1	20	10
		A4	B1	8	2	1	25	12.5
		A4	B1	8	2	0	25	0
		A4	B1	6	2	0	33.3333	0
		A4	B1	8	2	0	25	0
		A4	B2	12	0	1	0	8.33333
		A4	B2	13	1	1	7.69231	7.69231
		A4	B2	15	1	0	6.66667	0
		A4	B2	10	1	1	0	10
		A4	B3	10	1	2	10	20
		A4	B3	10	1	1	10	10
		A4	B3	11	1	1	9.09091	9.09091
		A4	B3	11	1	0	9.09091	0
		A4	B4	15	1	0	6.66667	0
		A4	B4	12	1	0	8.33333	0
		A4	B4	12	0	0	0	0
		A4	B4	13	0	0	0	0
		A5	B1	6	2	1	33.3333	16.6667
		A5	B1	8	3	0	37.5	0
		A5	B1	8	2	0	25	0
		A5	B1	6	2	1	33.3333	16.6667
		A5	B2	10	2	1	20	10
		A5	B2	10	2	0	20	0
		A5	B2	6	1	1	16.6667	16.6667
		A5	B2	6	1	0	16.6667	0
		A5	B3	8	2	1	25	12.5
		A5	B3	5	1		20	0
		A5	B3	8	2	1	25	12.5
		A5	B3	5	1		20	0
		A5	B4	9	1	0	11.1111	0
		A5	B4	15	0	0	0	0
		A5	B4	11	0	0	0	0
		A5	B4	10	1	0	10	0

## Sheet: Plantlet production
		Pretreatment days	Hormone concentrations	Number of anthers	Number of green plantlets	Number of albino plantlets	Green plantlet production%	Albino plantlet production%
		A1	B1	50	1	1	2	2
		A1	B1	60	1	1	1.66667	1.66667
		A1	B1	60	1	0	1.66667	0
		A1	B1	60	0	0	0	0
		A1	B2	30	1	0	3.33333	0
		A1	B2	40	1	1	2.5	2.5
		A1	B2	60	2	1	3.33333	1.66667
		A1	B2	40	1	0	2.5	0
		A1	B3	50	0	0	0	0
		A1	B3	50	0	0	0	0
		A1	B3	60	0	1	0	1.66667
		A1	B3	60	0	1	0	1.66667
		A1	B4	40	0	0	0	0
		A1	B4	40	1	0	2.5	0
		A1	B4	60	1	0	1.66667	0
		A1	B4	40	0	0	0	0
		A2	B1	40	2	1	5	2.5
		A2	B1	40	2	1	5	2.5
		A2	B1	35	1	1	2.85714	2.85714
		A2	B1	40	2	1	5	2.5
		A2	B2	60	1	1	1.66667	1.66667
		A2	B2	60	1	1	1.66667	1.66667
		A2	B2	60	1	1	1.66667	1.66667
		A2	B2	60	1	1	1.66667	1.66667
		A2	B3	40	0	0	0	0
		A2	B3	40	1	0	2.5	0
		A2	B3	60	1	0	1.66667	0
		A2	B3	40	0	0	0	0
		A2	B4	55	1	1	1.81818	1.81818
		A2	B4	55	1	1	1.81818	1.81818
		A2	B4	70	0	0	0	0
		A2	B4	70	0	0	0	0
		A3	B1	55	2	0	3.63636	0
		A3	B1	50	2	0	4	0
		A3	B1	50	2	0	4	0
		A3	B1	50	2	0	4	0
		A3	B2	50	0	0	0	0
		A3	B2	40	1	1	2.5	2.5
		A3	B2	60	1	1	1.66667	1.66667
		A3	B2	60	0	1	0	1.66667
		A3	B3	40	1	1	2.5	2.5
		A3	B3	35	1	0	2.85714	0
		A3	B3	35	1	0	2.85714	0
		A3	B3	40	1	1	2.5	2.5
		A3	B4	35	1	1	2.85714	2.85714
		A3	B4	40	1	1	2.5	2.5
		A3	B4	45	1	0	2.22222	0
		A3	B4	50	1	0	2	0
		A4	B1	35	1	0	2.85714	0
		A4	B1	50	2	0	4	0
		A4	B1	50	2	0	4	0
		A4	B1	50	2	1	4	2
		A4	B2	35	0	1	0	2.85714
		A4	B2	50	0	1	0	2
		A4	B2	50	0	1	0	2
		A4	B2	50	1	1	2	2
		A4	B3	70	1	1	1.42857	1.42857
		A4	B3	70	1	1	1.42857	1.42857
		A4	B3	80	1	2	1.25	2.5
		A4	B3	80	1	2	1.25	2.5
		A4	B4	40	0	0	0	0
		A4	B4	50	0	0	0	0
		A4	B4	50	0	0	0	0
		A4	B4	50	1	0	2	0
		A5	B1	40	2	1	5	2.5
		A5	B1	40	2	1	5	2.5
		A5	B1	50	2	0	4	0
		A5	B1	50	2	0	4	0
		A5	B2	55	2	0	3.63636	0
		A5	B2	50	2	1	4	2
		A5	B2	50	2	1	4	2
		A5	B2	50	2	0	4	0
		A5	B3	45	1	1	2.22222	2.22222
		A5	B3	40	1	1	2.5	2.5
		A5	B3	60	2	0	3.33333	0
		A5	B3	60	2	0	3.33333	0
		A5	B4	60	1	0	1.66667	0
		A5	B4	60	1	0	1.66667	0
		A5	B4	60	0	0	0	0
		A5	B4	60	0	0	0	0

## Sheet: Plant regeneration rate
		Pretreatment days	Hormone concentrations	Number of albino plantlets	Green plantlet production%	Plant regeneration rate%
		A1	B1	1	1	2
		A1	B1	1.66667	0.8333	2.49997
		A1	B1	1.66667	0.8333	2.49997
		A1	B1	1	1	2
		A1	B2	3.33333	0.83333	4.16666
		A1	B2	2.5	1.25	3.75
		A1	B2	3.33333	0.83333	4.16666
		A1	B2	2.5	1.25	3.75
		A1	B3	0	0.83333	0.83333
		A1	B3	0	0.83333	0.83333
		A1	B3	0	0.83333	0.83333
		A1	B3	0	0.83333	0.83333
		A1	B4	1.25	0	1.25
		A1	B4	1.25	0	1.25
		A1	B4	0.83333	0	0.83333
		A1	B4	0.83333	0	0.83333
		A2	B1	5	2.5	7.5
		A2	B1	5	2.5	7.5
		A2	B1	2.85714	2.85714	5.71429
		A2	B1	5	2.5	7.5
		A2	B2	1.66667	1.66667	3.33333
		A2	B2	1.66667	1.66667	3.33333
		A2	B2	1.66667	1.66667	3.33333
		A2	B2	1.66667	1.66667	3.33333
		A2	B3	1.25	0	1.25
		A2	B3	1.25	0	1.25
		A2	B3	0.83333	0	0.83333
		A2	B3	0.83333	0	0.83333
		A2	B4	0.909091	0.909091	1.81818
		A2	B4	0.909091	0.909091	1.81818
		A2	B4	0.909091	0.909091	1.81818
		A2	B4	0.909091	0.909091	1.81818
		A3	B1	3.63636	0	3.63636
		A3	B1	4	0	4
		A3	B1	4	0	4
		A3	B1	4	0	4
		A3	B2	1.25	1.25	2.5
		A3	B2	1.25	1.25	2.5
		A3	B2	0.83333	1.66667	2.5
		A3	B2	0.83333	1.66667	2.5
		A3	B3	2.5	1.25	3.75
		A3	B3	2.85714	1.25	4.10714
		A3	B3	2.85714	1.25	4.10714
		A3	B3	2.5	1.25	3.75
		A3	B4	2.85714	1.25	4.10714
		A3	B4	2.5	1.25	3.75
		A3	B4	2.22222	1.4286	3.65082
		A3	B4	2	1.4286	3.4286
		A4	B1	2.85714	0.5	3.35714
		A4	B1	4	0.5	4.5
		A4	B1	4	0.5	4.5
		A4	B1	4	0.5	4.5
		A4	B2	0.5	2.85714	3.35714
		A4	B2	0.5	2	2.5
		A4	B2	0.5	2	2.5
		A4	B2	0.5	2	2.5
		A4	B3	1.42857	1.42857	2.85714
		A4	B3	1.42857	1.42857	2.85714
		A4	B3	1.25	2.5	3.75
		A4	B3	1.25	2.5	3.75
		A4	B4	0.5	0	0.5
		A4	B4	0.5	0	0.5
		A4	B4	0.5	0	0.5
		A4	B4	0.5	0	0.5
		A5	B1	5	1.25	6.25
		A5	B1	5	1.25	6.25
		A5	B1	4	1.25	5.25
		A5	B1	4	1.25	5.25
		A5	B2	3.63636	1	4.63636
		A5	B2	4	1	5
		A5	B2	4	1	5
		A5	B2	4	1	5
		A5	B3	2.22222	1.25	3.47222
		A5	B3	2.5	1.25	3.75
		A5	B3	3.33333	1.1111	4.44443
		A5	B3	3.33333	1.1111	4.44443
		A5	B4	0.8333	0	0.8333
		A5	B4	0.8333	0	0.8333
		A5	B4	0.8333	0	0.8333
		A5	B4	0.8333	0	0.8333

## Sheet: Agronomic traits of 13 DH1
						株高	有效分蘖数	顶芒	侧芒	穗长	小穗数	穗粒数	穗粒重
				Name	Plant	Plant height cm	Number of effective tiller	Tip awn/ mm	Side awn/mm	Spike length/cm	Number of spikelet	Number of grains per spike	Grain weight per spike/g
				CK	2020-7337	146.1	4	4.81	4.57	15.1	36	48	2.43
						152.5	5	4.63	3.94	13.4	31	47	2.35
						154.2	4	4.38	4.36	12.5	32	43	2.12
				1	6	146.2	4	1.1	3.06	12.5	28	34	1.42
						148.1	5	7.75	6.13	12.7	32	38	1.62
						149.2	4	3.14	3.3	11.9	32	39	1.4
				2	7	152.6	6	4.24	3.14	13.5	32	41	2.01
						153.7	5	4.6	4.11	14.1	34	43	2.13
						155.2	6	3.5	4.43	13.2	34	39	1.95
				3	8	111.5	4	9.69	6.31	13.5	28	47	1.83
						112.7	3	8.55	8.05	12.7	30	45	1.67
						119.6	4	7.39	8.83	12.5	30	50	1.73
				4	9	119.7	4	8.18	9.26	12.5	30	49	2.11
						121.5	5	9.24	7.76	13.1	30	52	1.91
						123.1	5	8.03	6.56	12.4	32	46	1.83
				5	10	125.3	5	8.63	7.53	13.5	33	51	1.64
						127.1	5	6.79	6.64	12.5	33	45	1.71
						128.9	4	8.25	6.91	12.7	32	52	1.54
				6	11	134.2	6	9.96	7.23	14.2	34	47	2.2
						132.4	5	7.49	7.1	14.7	36	50	1.9
						130.7	5	8.2	9.62	14.1	34	52	2.13
				7	12	127.3	4	4.5	1	13.5	30	45	1.52
						129.3	5	4.46	2.3	12.5	33	42	1.62
						126.9	5	3.83	2.76	12.3	30	50	1.77
				8	14	109.3	4	4.77	2.28	11.9	28	33	1.97
						110.7	4	3.99	2.06	12.5	26	35	2.01
						112.5	5	3.27	1.86	12.3	28	39	1.88
				9	17	140.3	6	2.02	4.17	10.1	28	30	1.14
						142.5	6	5.4	3.8	11.5	26	35	1.28
						145.3	5	3.41	3.91	10.5	30	32	1.15
				10	18	104.2	4	4.92	4.73	12.8	28	30	1.16
						105.3	4	4.86	2.72	11.9	26	35	1.23
						109.3	6	4.53	3.73	12.5	30	36	1.09
				11	19	127.5	5	3.33	2.92	10.2	26	30	1.45
						123.6	5	3.05	1.61	10.5	28	26	1.35
						126.3	4	5.1	3.37	11.1	26	30	1.39
				12	28	153.7	4	3.16	3.52	13.5	32	45	2.29
						157.5	5	4.58	2.26	12.7	34	50	2.03
						157.6	6	5.76	3.1	13.9	33	43	2.08
				13	31	127.3	5	4.23	3.76	13.1	30	51	1.95
						125.3	5	3.56	4.01	12.1	30	45	2.03
						124.5	4	4.13	3.83	12.7	32	42	1.9

## Sheet: Sheet1
		Pretreatment days	Hormone concentrations	Number of anthers	Number of green plantlets	Number of albino plantlets	Green plantlet production%	Albino plantlet production%	Number of albino plantlets	Green plantlet production%	Plant regeneration rate%				Pretreatment days
	1	A1	B1	50	1	1	2	2	1	1	2
	1	A1	B1	60	1	1	1.66667	1.66667	1.66667	0.8333	2.49997
	1	A1	B1	60	1	0	1.66667	0	1.66667	0.8333	2.49997
	1	A1	B1	60	0	0	0	0	1	1	2
	2	A1	B2	30	1	0	3.33333	0	3.33333	0.83333	4.16666
	2	A1	B2	40	1	1	2.5	2.5	2.5	1.25	3.75
	2	A1	B2	60	2	1	3.33333	1.66667	3.33333	0.83333	4.16666
	2	A1	B2	40	1	0	2.5	0	2.5	1.25	3.75
	3	A1	B3	50	0	0	0	0	0	0.83333	0.83333
	3	A1	B3	50	0	0	0	0	0	0.83333	0.83333
	3	A1	B3	60	0	1	0	1.66667	0	0.83333	0.83333
	3	A1	B3	60	0	1	0	1.66667	0	0.83333	0.83333
	4	A1	B4	40	0	0	0	0	1.25	0	1.25
	4	A1	B4	40	1	0	2.5	0	1.25	0	1.25
	4	A1	B4	60	1	0	1.66667	0	0.83333	0	0.83333
	4	A1	B4	40	0	0	0	0	0.83333	0	0.83333
	5	A2	B1	40	2	1	5	2.5	5	2.5	7.5
	5	A2	B1	40	2	1	5	2.5	5	2.5	7.5
	5	A2	B1	35	1	1	2.85714	2.85714	2.85714	2.85714	5.71429
	5	A2	B1	40	2	1	5	2.5	5	2.5	7.5
	6	A2	B2	60	1	1	1.66667	1.66667	1.66667	1.66667	3.33333
	6	A2	B2	60	1	1	1.66667	1.66667	1.66667	1.66667	3.33333
	6	A2	B2	60	1	1	1.66667	1.66667	1.66667	1.66667	3.33333
	6	A2	B2	60	1	1	1.66667	1.66667	1.66667	1.66667	3.33333
	7	A2	B3	40	0	0	0	0	1.25	0	1.25
	7	A2	B3	40	1	0	2.5	0	1.25	0	1.25
	7	A2	B3	60	1	0	1.66667	0	0.83333	0	0.83333
	7	A2	B3	40	0	0	0	0	0.83333	0	0.83333
	8	A2	B4	55	1	1	1.81818	1.81818	0.909091	0.909091	1.81818
	8	A2	B4	55	1	1	1.81818	1.81818	0.909091	0.909091	1.81818
	8	A2	B4	70	0	0	0	0	0.909091	0.909091	1.81818
	8	A2	B4	70	0	0	0	0	0.909091	0.909091	1.81818
	9	A3	B1	55	2	0	3.63636	0	3.63636	0	3.63636
	9	A3	B1	50	2	0	4	0	4	0	4
	9	A3	B1	50	2	0	4	0	4	0	4
	9	A3	B1	50	2	0	4	0	4	0	4
	10	A3	B2	50	0	0	0	0	1.25	1.25	2.5
	10	A3	B2	40	1	1	2.5	2.5	1.25	1.25	2.5
	10	A3	B2	60	1	1	1.66667	1.66667	0.83333	1.66667	2.5
	10	A3	B2	60	0	1	0	1.66667	0.83333	1.66667	2.5
	11	A3	B3	40	1	1	2.5	2.5	2.5	1.25	3.75
	11	A3	B3	35	1	0	2.85714	0	2.85714	1.25	4.10714
	11	A3	B3	35	1	0	2.85714	0	2.85714	1.25	4.10714
	11	A3	B3	40	1	1	2.5	2.5	2.5	1.25	3.75
	12	A3	B4	35	1	1	2.85714	2.85714	2.85714	1.25	4.10714
	12	A3	B4	40	1	1	2.5	2.5	2.5	1.25	3.75
	12	A3	B4	45	1	0	2.22222	0	2.22222	1.4286	3.65082
	12	A3	B4	50	1	0	2	0	2	1.4286	3.4286
	13	A4	B1	35	1	0	2.85714	0	2.85714	0.5	3.35714
	13	A4	B1	50	2	0	4	0	4	0.5	4.5
	13	A4	B1	50	2	0	4	0	4	0.5	4.5
	13	A4	B1	50	2	1	4	2	4	0.5	4.5
	14	A4	B2	35	0	1	0	2.85714	0.5	2.85714	3.35714
	14	A4	B2	50	0	1	0	2	0.5	2	2.5
	14	A4	B2	50	0	1	0	2	0.5	2	2.5
	14	A4	B2	50	1	1	2	2	0.5	2	2.5
	15	A4	B3	70	1	1	1.42857	1.42857	1.42857	1.42857	2.85714
	15	A4	B3	70	1	1	1.42857	1.42857	1.42857	1.42857	2.85714
	15	A4	B3	80	1	2	1.25	2.5	1.25	2.5	3.75
	15	A4	B3	80	1	2	1.25	2.5	1.25	2.5	3.75
	16	A4	B4	40	0	0	0	0	0.5	0	0.5
	16	A4	B4	50	0	0	0	0	0.5	0	0.5
	16	A4	B4	50	0	0	0	0	0.5	0	0.5
	16	A4	B4	50	1	0	2	0	0.5	0	0.5
	17	A5	B1	40	2	1	5	2.5	5	1.25	6.25
	17	A5	B1	40	2	1	5	2.5	5	1.25	6.25
	17	A5	B1	50	2	0	4	0	4	1.25	5.25
	17	A5	B1	50	2	0	4	0	4	1.25	5.25
	18	A5	B2	55	2	0	3.63636	0	3.63636	1	4.63636
	18	A5	B2	50	2	1	4	2	4	1	5
	18	A5	B2	50	2	1	4	2	4	1	5
	18	A5	B2	50	2	0	4	0	4	1	5
	19	A5	B3	45	1	1	2.22222	2.22222	2.22222	1.25	3.47222
	19	A5	B3	40	1	1	2.5	2.5	2.5	1.25	3.75
	19	A5	B3	60	2	0	3.33333	0	3.33333	1.1111	4.44443
	19	A5	B3	60	2	0	3.33333	0	3.33333	1.1111	4.44443
	20	A5	B4	60	1	0	1.66667	0	0.8333	0	0.8333
	20	A5	B4	60	1	0	1.66667	0	0.8333	0	0.8333
	20	A5	B4	60	0	0	0	0	0.8333	0	0.8333
	20	A5	B4	60	0	0	0	0	0.8333	0	0.8333

## Sheet: Sheet2
		描述
				N	均值	标准差	标准误	均值的 95% 置信区间		极小值	极大值
								下限	上限
		绿苗分化率	1.00	4	1.33333	0.902671	0.451335	-0.103018	2.76968	0	2
			2.00	4	2.91667	0.481125	0.240563	2.15109	3.68224	2.5	3.33333
			3.00	4	0	0	0	0	0	0	0
			4.00	4	1.04167	1.25	0.625	-0.947362	3.0307	0	2.5
			5.00	4	4.46429	1.07143	0.535714	2.7594	6.16917	2.85714	5
			6.00	4	1.66667	3.70255e-17	1.85128e-17	1.66667	1.66667	1.66667	1.66667
			7.00	4	1.04167	1.25	0.625	-0.947362	3.0307	0	2.5
			8.00	4	0.909091	1.04973	0.524864	-0.76126	2.57944	0	1.81818
			9.00	4	3.90909	0.181818	0.0909091	3.61978	4.1984	3.63636	4
			10.00	4	1.04167	1.25	0.625	-0.947362	3.0307	0	2.5
			11.00	4	2.67857	0.206197	0.103098	2.35047	3.00668	2.5	2.85714
			12.00	4	2.39484	0.3699	0.18495	1.80625	2.98343	2	2.85714
			13.00	4	3.71429	0.571429	0.285714	2.80502	4.62356	2.85714	4
			14.00	4	0.5	1	0.5	-1.09122	2.09122	0	2
			15.00	4	1.33929	0.103098	0.0515491	1.17523	1.50334	1.25	1.42857
			16.00	4	0.5	1	0.5	-1.09122	2.09122	0	2
			17.00	4	4.5	0.57735	0.288675	3.58131	5.41869	4	5
			18.00	4	3.90909	0.181818	0.0909091	3.61978	4.1984	3.63636	4
			19.00	4	2.84722	0.572654	0.286327	1.936	3.75844	2.22222	3.33333
			20.00	4	0.833333	0.96225	0.481125	-0.697822	2.36449	0	1.66667
			总数	80	2.07704	1.56739	0.17524	1.72823	2.42584	0	5
		白苗分化率	1.00	4	0.916667	1.06719	0.533594	-0.781467	2.6148	0	2
			2.00	4	1.04167	1.25	0.625	-0.947362	3.0307	0	2.5
			3.00	4	0.833333	0.96225	0.481125	-0.697822	2.36449	0	1.66667
			4.00	4	0	0	0	0	0	0	0
			5.00	4	2.58929	0.178571	0.0892857	2.30514	2.87343	2.5	2.85714
			6.00	4	1.66667	3.70255e-17	1.85128e-17	1.66667	1.66667	1.66667	1.66667
			7.00	4	0	0	0	0	0	0	0
			8.00	4	0.909091	1.04973	0.524864	-0.76126	2.57944	0	1.81818
			9.00	4	0	0	0	0	0	0	0
			10.00	4	1.45833	1.04859	0.524294	-0.210204	3.12687	0	2.5
			11.00	4	1.25	1.44338	0.721688	-1.04673	3.54673	0	2.5
			12.00	4	1.33929	1.55333	0.776666	-1.13241	3.81098	0	2.85714
			13.00	4	0.5	1	0.5	-1.09122	2.09122	0	2
			14.00	4	2.21429	0.428571	0.214286	1.53233	2.89624	2	2.85714
			15.00	4	1.96429	0.61859	0.309295	0.979972	2.9486	1.42857	2.5
			16.00	4	0	0	0	0	0	0	0
			17.00	4	1.25	1.44338	0.721688	-1.04673	3.54673	0	2.5
			18.00	4	1	1.1547	0.57735	-0.837386	2.83739	0	2
			19.00	4	1.18056	1.3679	0.683948	-0.996074	3.35718	0	2.5
			20.00	4	0	0	0	0	0	0	0
			总数	80	1.00567	1.10373	0.1234	0.76005	1.2513	0	2.85714
		绿苗产率	1.00	4	1.33333	0.3849	0.19245	0.720871	1.9458	1	1.66667
			2.00	4	2.91667	0.481125	0.240563	2.15109	3.68224	2.5	3.33333
			3.00	4	0	0	0	0	0	0	0
			4.00	4	1.04167	0.240565	0.120282	0.658873	1.42446	0.83333	1.25
			5.00	4	4.46429	1.07143	0.535714	2.7594	6.16917	2.85714	5
			6.00	4	1.66667	3.70255e-17	1.85128e-17	1.66667	1.66667	1.66667	1.66667
			7.00	4	1.04167	0.240565	0.120282	0.658873	1.42446	0.83333	1.25
			8.00	4	0.909091	1.85128e-17	9.25638e-18	0.909091	0.909091	0.909091	0.909091
			9.00	4	3.90909	0.181818	0.0909091	3.61978	4.1984	3.63636	4
			10.00	4	1.04167	0.240565	0.120282	0.658873	1.42446	0.83333	1.25
			11.00	4	2.67857	0.206197	0.103098	2.35047	3.00668	2.5	2.85714
			12.00	4	2.39484	0.3699	0.18495	1.80625	2.98343	2	2.85714
			13.00	4	3.71429	0.571429	0.285714	2.80502	4.62356	2.85714	4
			14.00	4	0.5	0	0	0.5	0.5	0.5	0.5
			15.00	4	1.33929	0.103098	0.0515491	1.17523	1.50334	1.25	1.42857
			16.00	4	0.5	0	0	0.5	0.5	0.5	0.5
			17.00	4	4.5	0.57735	0.288675	3.58131	5.41869	4	5
			18.00	4	3.90909	0.181818	0.0909091	3.61978	4.1984	3.63636	4
			19.00	4	2.84722	0.572654	0.286327	1.936	3.75844	2.22222	3.33333
			20.00	4	0.8333	1.85128e-17	9.25638e-18	0.8333	0.8333	0.8333	0.8333
			总数	80	2.07704	1.45156	0.16229	1.75401	2.40007	0	5
		白苗产率	1.00	4	0.91665	0.0962443	0.0481221	0.763504	1.0698	0.8333	1
			2.00	4	1.04167	0.240565	0.120282	0.658873	1.42446	0.83333	1.25
			3.00	4	0.83333	1.85128e-17	9.25638e-18	0.83333	0.83333	0.83333	0.83333
			4.00	4	0	0	0	0	0	0	0
			5.00	4	2.58929	0.178571	0.0892857	2.30514	2.87343	2.5	2.85714
			6.00	4	1.66667	3.70255e-17	1.85128e-17	1.66667	1.66667	1.66667	1.66667
			7.00	4	0	0	0	0	0	0	0
			8.00	4	0.909091	1.85128e-17	9.25638e-18	0.909091	0.909091	0.909091	0.909091
			9.00	4	0	0	0	0	0	0	0
			10.00	4	1.45833	0.240563	0.120281	1.07554	1.84112	1.25	1.66667
			11.00	4	1.25	0	0	1.25	1.25	1.25	1.25
			12.00	4	1.3393	0.103115	0.0515574	1.17522	1.50338	1.25	1.4286
			13.00	4	0.5	0	0	0.5	0.5	0.5	0.5
			14.00	4	2.21429	0.428571	0.214286	1.53233	2.89624	2	2.85714
			15.00	4	1.96429	0.61859	0.309295	0.979972	2.9486	1.42857	2.5
			16.00	4	0	0	0	0	0	0	0
			17.00	4	1.25	0	0	1.25	1.25	1.25	1.25
			18.00	4	1	0	0	1	1	1	1
			19.00	4	1.18055	0.080194	0.040097	1.05294	1.30816	1.1111	1.25
			20.00	4	0	0	0	0	0	0	0
			总数	80	1.00567	0.769899	0.0860773	0.83434	1.177	0	2.85714
		植株再生率	1.00	4	2.24998	0.288656	0.144328	1.79067	2.7093	2	2.49997
			2.00	4	3.95833	0.240561	0.12028	3.57555	4.34112	3.75	4.16666
			3.00	4	0.83333	1.85128e-17	9.25638e-18	0.83333	0.83333	0.83333	0.83333
			4.00	4	1.04167	0.240565	0.120282	0.658873	1.42446	0.83333	1.25
			5.00	4	7.05357	0.892857	0.446429	5.63284	8.47431	5.71429	7.5
			6.00	4	3.33333	7.4051e-17	3.70255e-17	3.33333	3.33333	3.33333	3.33333
			7.00	4	1.04167	0.240565	0.120282	0.658873	1.42446	0.83333	1.25
			8.00	4	1.81818	3.70255e-17	1.85128e-17	1.81818	1.81818	1.81818	1.81818
			9.00	4	3.90909	0.181818	0.0909091	3.61978	4.1984	3.63636	4
			10.00	4	2.5	1.92431e-06	9.62154e-07	2.5	2.5	2.5	2.5
			11.00	4	3.92857	0.206197	0.103098	3.60047	4.25668	3.75	4.10714
			12.00	4	3.73414	0.282654	0.141327	3.28438	4.18391	3.4286	4.10714
			13.00	4	4.21429	0.571429	0.285714	3.30502	5.12356	3.35714	4.5
			14.00	4	2.71429	0.428571	0.214286	2.03233	3.39624	2.5	3.35714
			15.00	4	3.30357	0.515491	0.257746	2.48331	4.12383	2.85714	3.75
			16.00	4	0.5	0	0	0.5	0.5	0.5	0.5
			17.00	4	5.75	0.57735	0.288675	4.83131	6.66869	5.25	6.25
			18.00	4	4.90909	0.181818	0.0909091	4.61978	5.1984	4.63636	5
			19.00	4	4.02777	0.494303	0.247151	3.24123	4.81432	3.47222	4.44443
			20.00	4	0.8333	1.85128e-17	9.25638e-18	0.8333	0.8333	0.8333	0.8333
			总数	80	3.08271	1.75642	0.196374	2.69184	3.47358	0.5	7.5
		单因素方差分析
				平方和	df	均方	F	显著性
		绿苗分化率	组间	157.62	19	8.29578	13.6517	3.07355e-15
			组内	36.4605	60	0.607675
			总数	194.08	79
		白苗分化率	组间	44.6059	19	2.34768	2.72812	0.00164282
			组内	51.6329	60	0.860549
			总数	96.2388	79
		绿苗产率	组间	157.62	19	8.2958	56.3365	3.67624e-31
			组内	8.83526	60	0.147254
			总数	166.455	79
		白苗产率	组间	44.6059	19	2.34768	63.4266	1.31739e-32
			组内	2.22085	60	0.0370141
			总数	46.8268	79
		植株再生率	组间	235.928	19	12.4172	95.655	1.08132e-37
			组内	7.78877	60	0.129813
			总数	243.717	79
		绿苗分化率
		Duncan
		序号	N	alpha = 0.05 的子集
				1	2	3	4	5	6	7
		3.00	4	0
		14.00	4	0.5	0.5
		16.00	4	0.5	0.5
		20.00	4	0.833333	0.833333
		8.00	4	0.909091	0.909091
		4.00	4	1.04167	1.04167
		7.00	4	1.04167	1.04167
		10.00	4	1.04167	1.04167
		1.00	4		1.33333	1.33333
		15.00	4		1.33929	1.33929
		6.00	4		1.66667	1.66667	1.66667
		12.00	4			2.39484	2.39484	2.39484
		11.00	4				2.67857	2.67857	2.67857
		19.00	4				2.84722	2.84722	2.84722
		2.00	4					2.91667	2.91667
		13.00	4						3.71429	3.71429
		9.00	4						3.90909	3.90909
		18.00	4						3.90909	3.90909
		5.00	4							4.46429
		17.00	4							4.5
		显著性		0.111572	0.0790929	0.082774	0.0534086	0.396168	0.0530634	0.211766
		将显示同类子集中的组均值。
		a. 将使用调和均值样本大小 = 4.000。
		白苗分化率
		Duncan
		序号	N	alpha = 0.05 的子集
				1	2	3	4
		4.00	4	0
		7.00	4	0
		9.00	4	0
		16.00	4	0
		20.00	4	0
		13.00	4	0.5	0.5
		3.00	4	0.833333	0.833333	0.833333
		8.00	4	0.909091	0.909091	0.909091
		1.00	4	0.916667	0.916667	0.916667
		18.00	4	1	1	1
		2.00	4	1.04167	1.04167	1.04167
		19.00	4	1.18056	1.18056	1.18056	1.18056
		11.00	4	1.25	1.25	1.25	1.25
		17.00	4	1.25	1.25	1.25	1.25
		12.00	4	1.33929	1.33929	1.33929	1.33929
		10.00	4	1.45833	1.45833	1.45833	1.45833
		6.00	4		1.66667	1.66667	1.66667
		15.00	4		1.96429	1.96429	1.96429
		14.00	4			2.21429	2.21429
		5.00	4				2.58929
		显著性		0.0727387	0.0684055	0.085935	0.0724662
		将显示同类子集中的组均值。
		a. 将使用调和均值样本大小 = 4.000。
		绿苗产率
		Duncan
		序号	N	alpha = 0.05 的子集
				1	2	3	4	5	6	7	8
		3.00	4	0
		14.00	4	0.5	0.5
		16.00	4	0.5	0.5
		20.00	4		0.8333	0.8333
		8.00	4		0.909091	0.909091
		4.00	4		1.04167	1.04167
		7.00	4		1.04167	1.04167
		10.00	4		1.04167	1.04167
		1.00	4			1.33333	1.33333
		15.00	4			1.33929	1.33929
		6.00	4				1.66667
		12.00	4					2.39484
		11.00	4					2.67857
		19.00	4					2.84722
		2.00	4					2.91667
		13.00	4						3.71429
		9.00	4						3.90909	3.90909
		18.00	4						3.90909	3.90909
		5.00	4							4.46429	4.46429
		17.00	4								4.5
		显著性		0.086004	0.0888409	0.112423	0.252505	0.0832014	0.503898	0.0566524	0.895725
		将显示同类子集中的组均值。
		a. 将使用调和均值样本大小 = 4.000。
		白苗产率
		Duncan
		序号	N	alpha = 0.05 的子集
				1	2	3	4	5	6	7	8	9	10
		4.00	4	0
		7.00	4	0
		9.00	4	0
		16.00	4	0
		20.00	4	0
		13.00	4		0.5
		3.00	4			0.83333
		8.00	4			0.909091	0.909091
		1.00	4			0.91665	0.91665
		18.00	4			1	1	1
		2.00	4			1.04167	1.04167	1.04167	1.04167
		19.00	4				1.18055	1.18055	1.18055	1.18055
		11.00	4					1.25	1.25	1.25
		17.00	4					1.25	1.25	1.25
		12.00	4						1.3393	1.3393
		10.00	4							1.45833	1.45833
		6.00	4								1.66667
		15.00	4									1.96429
		14.00	4									2.21429
		5.00	4										2.58929
		显著性		1	1	0.179401	0.0790791	0.106299	0.0537797	0.0722259	0.130925	0.0710614	1
		将显示同类子集中的组均值。
		a. 将使用调和均值样本大小 = 4.000。
		植株再生率
		Duncan
		序号	N	alpha = 0.05 的子集
				1	2	3	4	5	6	7	8
		16.00	4	0.5
		20.00	4	0.8333
		3.00	4	0.83333
		4.00	4	1.04167
		7.00	4	1.04167
		8.00	4		1.81818
		1.00	4		2.24998	2.24998
		10.00	4			2.5
		14.00	4			2.71429
		15.00	4				3.30357
		6.00	4				3.33333
		12.00	4				3.73414	3.73414
		9.00	4					3.90909
		11.00	4					3.92857
		2.00	4					3.95833
		19.00	4					4.02777
		13.00	4					4.21429
		18.00	4						4.90909
		17.00	4							5.75
		5.00	4								7.05357
		显著性		0.0610415	0.0952819	0.0895014	0.115323	0.103669	1	1	1
		将显示同类子集中的组均值。
		a. 将使用调和均值样本大小 = 4.000。
